# Supplementary material for: Genomic epidemiology and population structure of Neisseria gonorrhoeae from remote highly endemic Western Australian populations
Source: PubMed Central journal article supplement (PMC6889462; doi:10.1186/s12864-018-4557-5), 2018-02-27
Supplement: 12864_2018_4557_MOESM1_ESM.pdf [file 12864_2018_4557_MOESM1_ESM.pdf]

**Table S1: Sequencing and assembly quality statistics of the 59 Western Australian *N. gonorrhoeae* isolates**

| ISOLATE | NUMBER READS | MAXIMUM READ LENGTH | Total length (>= 0 bp) | Total length (>= 1000 bp) | # contigs | Largest contig | Total length | GC (%) | N50   | N75   | L50 | L75 |
|---------|--------------|---------------------|------------------------|---------------------------|-----------|----------------|--------------|--------|-------|-------|-----|-----|
| EXNG202 | 1650072      | 301                 | 2210215                | 2148505                   | 159       | 112181         | 2177922      | 52.37  | 38575 | 18981 | 18  | 39  |
| EXNG204 | 1402770      | 301                 | 2173781                | 2151201                   | 90        | 205090         | 2157908      | 52.43  | 52649 | 30902 | 11  | 24  |
| EXNG205 | 1278354      | 301                 | 2199580                | 2151855                   | 137       | 113649         | 2166323      | 52.48  | 41022 | 20363 | 19  | 37  |
| EXNG209 | 1700186      | 301                 | 2230161                | 2192634                   | 103       | 189628         | 2206292      | 52.33  | 60181 | 32523 | 12  | 24  |
| EXNG210 | 1110594      | 301                 | 2164541                | 2137523                   | 132       | 123865         | 2148368      | 52.51  | 31701 | 17564 | 18  | 41  |
| EXNG213 | 1457780      | 301                 | 2190869                | 2143572                   | 126       | 167663         | 2164345      | 52.27  | 39671 | 20763 | 14  | 32  |
| EXNG214 | 1530790      | 301                 | 2173642                | 2141494                   | 101       | 170009         | 2151308      | 52.48  | 55228 | 20720 | 12  | 27  |
| EXNG217 | 2498630      | 301                 | 2187923                | 2143945                   | 106       | 243068         | 2156314      | 52.43  | 49895 | 24489 | 11  | 25  |
| EXNG218 | 1395016      | 301                 | 2174053                | 2145529                   | 125       | 170374         | 2156256      | 52.44  | 47349 | 19878 | 14  | 33  |
| EXNG219 | 1075998      | 301                 | 2168334                | 2145743                   | 122       | 109169         | 2159835      | 52.53  | 45743 | 20470 | 18  | 35  |
| EXNG224 | 1959886      | 301                 | 2159483                | 2132550                   | 95        | 262884         | 2143041      | 52.47  | 57806 | 26499 | 9   | 23  |
| EXNG225 | 1838888      | 301                 | 2194441                | 2145733                   | 125       | 104207         | 2159207      | 52.49  | 32790 | 19492 | 20  | 41  |
| EXNG226 | 1510216      | 301                 | 2189852                | 2145569                   | 130       | 131577         | 2168199      | 52.42  | 41168 | 21725 | 16  | 34  |
| EXNG229 | 915446       | 301                 | 2202234                | 2143355                   | 144       | 189697         | 2162298      | 52.5   | 45562 | 20185 | 16  | 35  |
| EXNG230 | 1634624      | 301                 | 2224339                | 2192639                   | 111       | 207691         | 2213645      | 52.28  | 61143 | 28102 | 10  | 23  |
| EXNG232 | 2016894      | 301                 | 2144223                | 2092595                   | 123       | 175521         | 2115087      | 52.66  | 57450 | 25832 | 13  | 27  |
| EXNG234 | 1329232      | 301                 | 2187913                | 2149986                   | 94        | 192498         | 2164232      | 52.41  | 64443 | 30077 | 11  | 23  |
| EXNG235 | 1788934      | 301                 | 2220434                | 2193801                   | 94        | 173743         | 2208121      | 52.37  | 61761 | 31628 | 9   | 22  |
| EXNG236 | 1630616      | 301                 | 2154083                | 2119147                   | 144       | 101077         | 2132786      | 52.64  | 30976 | 17172 | 21  | 44  |
| EXNG237 | 748372       | 301                 | 2179678                | 2153821                   | 100       | 113506         | 2167147      | 52.37  | 59250 | 27048 | 15  | 27  |
| EXNG238 | 813842       | 301                 | 2150724                | 2131293                   | 113       | 140722         | 2140967      | 52.6   | 40610 | 23054 | 17  | 35  |
| EXNG239 | 1206320      | 301                 | 2179359                | 2154361                   | 108       | 243099         | 2167213      | 52.38  | 55670 | 23540 | 12  | 26  |
| EXNG242 | 1695488      | 301                 | 2147235                | 2119974                   | 96        | 1133987        | 2130736      | 52.59  | 46083 | 23523 | 15  | 31  |
| EXNG248 | 1256682      | 301                 | 2174053                | 2137503                   | 115       | 101873         | 2150979      | 52.58  | 41204 | 25180 | 17  | 33  |
| EXNG250 | 1268026      | 301                 | 2190449                | 2171015                   | 96        | 175984         | 2178083      | 52.53  | 48117 | 22998 | 13  | 29  |
| EXNG252 | 1463466      | 301                 | 2161090                | 2138917                   | 89        | 205101         | 2145291      | 52.48  | 52964 | 23864 | 12  | 27  |
| EXNG253 | 1444344      | 301                 | 2177510                | 2144153                   | 113       | 308494         | 2158734      | 52.46  | 49697 | 23360 | 11  | 26  |
| EXNG254 | 1389218      | 301                 | 2106497                | 2088950                   | 94        | 126447         | 2093615      | 52.75  | 57398 | 20877 | 14  | 29  |
| EXNG257 | 990974       | 301                 | 2167302                | 2129515                   | 150       | 133188         | 2144947      | 52.66  | 31730 | 18203 | 20  | 45  |
| EXNG259 | 1324310      | 301                 | 2193243                | 2133764                   | 152       | 177791         | 2160359      | 52.36  | 38679 | 18865 | 18  | 39  |
| EXNG261 | 1231512      | 301                 | 2219973                | 2191248                   | 98        | 233417         | 2202964      | 52.42  | 55945 | 30443 | 12  | 26  |
| EXNG264 | 1685018      | 301                 | 2247459                | 2183393                   | 124       | 207513         | 2207258      | 52.2   | 47369 | 24693 | 14  | 30  |
| EXNG266 | 1499634      | 301                 | 2161538                | 2137871                   | 107       | 127931         | 2148444      | 52.54  | 39371 | 21535 | 18  | 36  |
| EXNG270 | 1317404      | 301                 | 2205242                | 2184299                   | 99        | 173901         | 2196995      | 52.41  | 57422 | 31642 | 13  | 25  |
| EXNG271 | 2538250      | 301                 | 2217722                | 2181724                   | 88        | 207508         | 2191366      | 52.36  | 60596 | 32296 | 11  | 23  |
| EXNG272 | 1376266      | 301                 | 2124225                | 2098724                   | 95        | 238336         | 2110249      | 52.66  | 59669 | 27518 | 10  | 23  |
| EXNG277 | 1893236      | 301                 | 2166508                | 2137790                   | 103       | 197688         | 2149676      | 52.46  | 53465 | 23491 | 11  | 26  |
| EXNG278 | 1670082      | 301                 | 2218816                | 2183072                   | 119       | 205495         | 2200387      | 52.25  | 45668 | 23471 | 14  | 30  |
| EXNG281 | 1114386      | 301                 | 2175034                | 2151153                   | 89        | 207853         | 2158576      | 52.39  | 52970 | 31591 | 10  | 23  |
| EXNG282 | 1093340      | 301                 | 2194481                | 2155929                   | 86        | 243051         | 2163834      | 52.4   | 64590 | 41165 | 10  | 20  |
| EXNG283 | 1310872      | 301                 | 2110473                | 2081088                   | 112       | 139005         | 2089661      | 52.72  | 41082 | 24285 | 17  | 34  |
| EXNG285 | 2026754      | 301                 | 2186048                | 2146836                   | 92        | 243141         | 2157082      | 52.46  | 57647 | 30409 | 11  | 23  |
| EXNG287 | 783198       | 301                 | 2218700                | 2185760                   | 159       | 99326          | 2207943      | 52.43  | 36802 | 16537 | 21  | 45  |
| EXNG288 | 1625042      | 301                 | 2222159                | 2185404                   | 99        | 178451         | 2196932      | 52.4   | 47153 | 23861 | 14  | 30  |
| EXNG289 | 1063504      | 301                 | 2213293                | 2178848                   | 136       | 113312         | 2198039      | 52.41  | 39101 | 19270 | 17  | 38  |
| EXNG290 | 1659254      | 301                 | 2230374                | 2198376                   | 100       | 170075         | 2209491      | 52.32  | 63784 | 31128 | 11  | 25  |
| EXNG294 | 957682       | 301                 | 2223597                | 2181460                   | 111       | 189688         | 2192944      | 52.39  | 43017 | 21758 | 13  | 31  |
| EXNG295 | 1081510      | 301                 | 2174040                | 2147622                   | 140       | 90722          | 2165339      | 52.57  | 32496 | 18118 | 22  | 45  |
| EXNG296 | 1384290      | 301                 | 2223512                | 2187862                   | 102       | 207514         | 2199216      | 52.32  | 47025 | 27893 | 13  | 27  |
| EXNG301 | 2160786      | 301                 | 2303774                | 2205909                   | 157       | 203345         | 2249084      | 52.33  | 54915 | 25524 | 12  | 28  |
| EXNG302 | 1432752      | 301                 | 2139201                | 2090855                   | 99        | 207686         | 2104526      | 52.74  | 59527 | 25770 | 11  | 24  |
| EXNG304 | 1236338      | 301                 | 2165226                | 2145511                   | 88        | 207781         | 2153703      | 52.43  | 59316 | 32046 | 10  | 23  |
| EXNG305 | 1339424      | 301                 | 2186673                | 2139619                   | 124       | 146586         | 2154048      | 52.5   | 46950 | 20815 | 15  | 32  |
| EXNG307 | 1314822      | 301                 | 2186273                | 2171368                   | 79        | 207914         | 2177591      | 52.43  | 57800 | 35166 | 11  | 23  |
| EXNG309 | 1581012      | 301                 | 2161813                | 2147706                   | 70        | 216269         | 2150766      | 52.52  | 78145 | 39072 | 8   | 18  |
| EXNG314 | 1583528      | 301                 | 2326137                | 2224233                   | 213       | 194342         | 2277597      | 52.35  | 37349 | 16845 | 19  | 43  |
| EXNG316 | 803852       | 301                 | 2154234                | 2136579                   | 102       | 134110         | 2146754      | 52.57  | 49281 | 26531 | 16  | 31  |
| EXNG321 | 627910       | 301                 | 2154273                | 2130559                   | 130       | 96793          | 2143589      | 52.62  | 35329 | 18758 | 19  | 41  |
| EXNG322 | 2932636      | 301                 | 2232748                | 2209637                   | 100       | 208429         | 2219751      | 52.32  | 46712 | 29586 | 14  | 28  |

N50 The shortest sequence length at 50% of the genome  
N75 The shortest sequence length at 75% of the genome  
L50 The smallest number of contigs whose length sum produces N50  
L75 The smallest number of contigs whose length sum produces N75
