# Supplementary material for: Genomic epidemiology and population structure of Neisseria gonorrhoeae from remote highly endemic Western Australian populations
Source: PubMed Central journal article supplement (PMC6889462; doi:10.1186/s12864-018-4557-5), 2018-02-27
Supplement: 12864_2018_4557_MOESM2_ESM.pdf [file 12864_2018_4557_MOESM2_ESM.pdf]

**Table S2:** Western Australian *N. gonorrhoeae* isolates metadata and genetic characteristics of antimicrobial resistance

| Isolate  | RecdDate   | Location     | Pen MIC | Pen Interpretation | Cef MIC | Cef Interpretation | Cip MIC | Cip Interpretation | Tet MIC | Tet Interpretation | Spe MIC | Azi MIC | Azi Interpretation | Spe Interpretation | Core genome cluster | Population structure group | MLST  | NG-MS* | NG-STAR | Macrolids<br>23S_rRNA | B-lactams<br>NEIS1014_posA | B-lactams<br>NEIS1233_posB | B-lactams<br>NEIS2020_posB | B-lactams<br>posB_type | Fluoroquinolones<br>NEIS1230_gyrA | Fluoroquinolones<br>NEIS1525_posC | Ethex pumps<br>NEIS1635_ntrB | Ethex pumps<br>pos_NEIS1635 | plasmid216    | plasmid10   | plasmid215 | plasmid217     | ESCs              |     |     |
|----------|------------|--------------|---------|--------------------|---------|--------------------|---------|--------------------|---------|--------------------|---------|---------|--------------------|--------------------|---------------------|----------------------------|-------|--------|---------|-----------------------|----------------------------|----------------------------|----------------------------|------------------------|-----------------------------------|-----------------------------------|------------------------------|-----------------------------|---------------|-------------|------------|----------------|-------------------|-----|-----|
| EnNg 202 | 1/18/2011  | Remonte      | 0.125   | LS                 | <-0.008 | S                  | <-0.03  | S                  | <-8     | Not TRNG           | <-0.4   | <-0.5   | S                  | S                  | A                   | Au1                        | 12045 | 1498   | NV17    | 10                    | 13 (L421P)                 | 166                        | 1429                       | IA                     | 230                               | 952                               | 812 (ASP7)                   | 6                           | Neg           | Neg         | 612        | Pos            | Neg               |     |     |
| EnNg 204 | 1/22/2011  | Remonte      | 0.25    | LS                 | <-0.008 | S                  | <-0.03  | S                  | <-8     | Not TRNG           | <-0.4   | <-0.5   | S                  | S                  | B                   | Au1                        | 7363  | 10103  | NV12    | 10                    | 13 (L421P)                 | 166                        | 704                        | IA                     | 807                               | 402                               | 808 (ASP7)                   | 6                           | Neg           | 17          | Pos        | Neg            | 17                | Pos | Neg |
| EnNg 205 | 2/2/2011   | Remonte      | 0.25    | LS                 | <-0.008 | S                  | <-0.03  | S                  | <-8     | Not TRNG           | <-0.4   | <-0.5   | S                  | S                  | B                   | Au1                        | 7363  | 10080  | NV11    | 10                    | 13 (L421P)                 | 166                        | 1430 (GI20K, A121V)        | IB                     | 807                               | 402                               | 808 (ASP7)                   | 6                           | Neg           | Neg         | 17         | Pos            | Neg               |     |     |
| EnNg 209 | 3/11/2011  | Metropolitan | 0.125   | LS                 | <-0.008 | S                  | <-0.03  | S                  | >=16    | TRNG               | <-0.4   | <-0.5   | S                  | S                  | C                   | Au2                        | 12042 | 9716   | NV5     | 539                   | 13 (L421P)                 | 23                         | 1431                       | IA                     | 19                                | 951                               | 953 (BC)                     | 6                           | 2 (American)  | Neg         | 17         | Pos            | pEG500 (American) |     |     |
| EnNg 210 | 3/28/2011  | Remonte      | 0.06    | LS                 | <-0.008 | S                  | <-0.03  | S                  | <-8     | Not TRNG           | <-0.4   | <-0.6   | S                  | S                  | B                   | Au1                        | 12040 | 7126   | NV8     | 10                    | 8                          | 166                        | 704                        | IA                     | 230                               | 952                               | 808 (ASP7)                   | 6                           | Neg           | Neg         | 17         | Pos            | Neg               |     |     |
| EnNg 213 | 5/19/2011  | Remonte      | 0.125   | LS                 | <-0.008 | S                  | <-0.03  | S                  | <-8     | Not TRNG           | <-0.4   | <-0.5   | S                  | S                  | B                   | Au1                        | 12040 | 7126   | NV8     | 10                    | 8                          | 166                        | 704                        | IA                     | 230                               | 402                               | 808 (ASP7)                   | 6                           | Neg           | Neg         | 17         | Pos            | Neg               |     |     |
| EnNg 214 | 6/1/2011   | Remonte      | 0.125   | LS                 | <-0.008 | S                  | <-0.03  | S                  | <-8     | Not TRNG           | <-0.4   | <-0.5   | S                  | S                  | A                   | Au1                        | 12045 | 758    | NV15    | 10                    | 13 (L421P)                 | 166                        | 536                        | IA                     | 230                               | 955                               | 953 (BC)                     | 6                           | Neg           | Neg         | 612        | Pos            | Neg               |     |     |
| EnNg 217 | 6/15/2011  | Remonte      | 0.125   | LS                 | <-0.008 | S                  | <-0.03  | S                  | <-8     | Not TRNG           | <-0.4   | <-0.5   | S                  | S                  | A                   | Au1                        | 12045 | 758    | NV14    | 10                    | 13 (L421P)                 | 166                        | 536                        | IA                     | 230                               | 955                               | 808 (ASP7)                   | 6                           | Neg           | Neg         | 612        | Pos            | Neg               |     |     |
| EnNg 218 | 6/27/2011  | Remonte      | 0.06    | LS                 | <-0.008 | S                  | <-0.03  | S                  | <-8     | Not TRNG           | <-0.4   | <-0.5   | S                  | S                  | B                   | Au1                        | 7363  | 10103  | NV12    | 10                    | 13 (L421P)                 | 166                        | 704                        | IA                     | 807                               | 402                               | 808 (ASP7)                   | 6                           | Neg           | Neg         | 17         | Pos            | Neg               |     |     |
| EnNg 219 | 7/4/2011   | Remonte      | 0.125   | LS                 | <-0.008 | S                  | <-0.03  | S                  | <-8     | Not TRNG           | <-0.4   | <-0.5   | S                  | S                  | B                   | Au1                        | 7363  | 7803   | NV12    | 10                    | 13 (L421P)                 | 166                        | 704                        | IA                     | 807                               | 402                               | 808 (ASP7)                   | 6                           | Neg           | Neg         | 17         | Pos            | Neg               |     |     |
| EnNg 224 | 7/29/2011  | Metropolitan | 0.25    | LS                 | <-0.008 | S                  | <-0.03  | S                  | <-8     | Not TRNG           | <-0.4   | <-0.5   | S                  | S                  | B                   | Au1                        | 12040 | 7823   | NV7     | 10                    | 13 (L421P)                 | 166                        | 609                        | IA                     | 230                               | 402                               | 808 (ASP7)                   | 6                           | Neg           | Neg         | 17         | Pos            | Neg               |     |     |
| EnNg 225 | 8/3/2011   | Remonte      | 0.125   | LS                 | <-0.008 | S                  | <-0.03  | S                  | <-8     | Not TRNG           | <-0.4   | <-0.5   | S                  | S                  | A                   | Au1                        | 12045 | 758    | NV14    | 10                    | 13 (L421P)                 | 166                        | 536                        | IA                     | 230                               | 953                               | 808 (ASP7)                   | 6                           | Neg           | Neg         | 612        | Pos            | Neg               |     |     |
| EnNg 226 | 9/5/2011   | Remonte      | >=2     | PPNG               | <-0.008 | S                  | >=4     | R                  | >=16    | TRNG               | <-0.4   | <-0.5   | S                  | S                  | S                   | Iu1                        | 8145  | 436    | NC2     | 430                   | 8                          | 166                        | 1432                       | IA                     | 234 (SH1E, D95A)                  | 948 (DSN8)                        | 16                           | 3 (-35A)                    | 1 (Duch)      | 3 (bITEM-1) | 17         | Neg            | pEG500 (American) |     |     |
| EnNg 229 | 11/15/2011 | Metropolitan | 0.125   | LS                 | <-0.008 | S                  | <-0.03  | S                  | <-8     | Not TRNG           | <-0.4   | <-0.5   | S                  | S                  | A                   | Au1                        | 12045 | 758    | NV14    | 10                    | 13 (L421P)                 | 166                        | 536                        | IA                     | 230                               | 952                               | 808 (ASP7)                   | 6                           | Neg           | Neg         | 17         | Pos            | Neg               |     |     |
| EnNg 230 | 11/15/2011 | Remonte      | 0.125   | LS                 | <-0.008 | S                  | <-0.03  | S                  | >=16    | TRNG               | <-0.4   | <-0.5   | S                  | S                  | C                   | Au2                        | 12042 | 9716   | NV5     | 539                   | 13 (L421P)                 | 23                         | 1431                       | IA                     | 19                                | 951                               | 953 (BC)                     | 6                           | 2 (American)  | Neg         | 17         | Pos            | pEG500 (American) |     |     |
| EnNg 232 | 11/17/2011 | Metropolitan | 1       | CMRP               | 0.016   | S                  | >=4     | H                  | <-8     | Not TRNG           | <-0.4   | <-0.5   | S                  | S                  | S                   | Iu1                        | 1901  | 225    | 177     | 231                   | 23                         | 283                        | 544 (GI20K, A121D)         | IB                     | 231 (SH1E, D95G)                  | 243 (SSTR)                        | 13                           | 3 (-35A)                    | Neg           | Neg         | 18 (R25H)  | Neg            | Neg               |     |     |
| EnNg 234 | 11/29/2011 | Metropolitan | 0.125   | LS                 | <-0.008 | S                  | <-0.03  | S                  | <-8     | Not TRNG           | <-0.4   | <-0.5   | S                  | S                  | A                   | Au1                        | 12045 | 758    | NV14    | 10                    | 13 (L421P)                 | 166                        | 536                        | IA                     | 230                               | 952                               | 808 (ASP7)                   | 6                           | Neg           | Neg         | 17         | Pos            | Neg               |     |     |
| EnNg 235 | 1/3/2012   | Metropolitan | 1       | PPNG               | <-0.008 | S                  | >=4     | H                  | <-8     | Not TRNG           | <-0.4   | <-0.5   | S                  | S                  | A                   | Iu1                        | 1924  | 10105  | NV2     | 234                   | 8                          | 23                         | 1441                       | IA                     | 19                                | 631                               | 193 (ASP7)                   | 6                           | 1 (Duch)      | 3 (bITEM-1) | 20         | Pos            | pEP289 (Dutch)    |     |     |
| EnNg 236 | 1/6/2012   | Metropolitan | 0.125   | LS                 | <-0.008 | S                  | <-0.03  | S                  | <-8     | Not TRNG           | <-0.4   | <-0.5   | S                  | S                  | A                   | Au1                        | 12045 | 758    | NV14    | 10                    | 13 (L421P)                 | 166                        | 536                        | IA                     | 230                               | 952                               | 808 (ASP7)                   | 6                           | Neg           | Neg         | 17         | Pos            | Neg               |     |     |
| EnNg 237 | 2/7/2012   | Metropolitan | 1       | CMRP               | 0.06    | DS                 | >=4     | H                  | <-8     | Not TRNG           | <-0.4   | <-0.5   | S                  | S                  | A                   | Iu2                        | 7360  | 1407   | 90      | 387                   | 17 (L421P)                 | 266 (XXXIV Mosaic)         | 552 (GI20K, A121N)         | IB                     | 14 (SH1E, D95G)                   | 104 (SSTR)                        | 13                           | 3 (-35A)                    | Neg           | Neg         | 18 (R25H)  | Pos            | Neg               |     |     |
| EnNg 238 | 2/18/2012  | Metropolitan | >=2     | PPNG               | <-0.008 | S                  | >=4     | H                  | <-8     | Not TRNG           | <-0.4   | <-0.5   | S                  | S                  | B                   | Iu1                        | 1588  | 1015   | NC1     | 231                   | 13 (L421P)                 | 228                        | 1436 (GI20K, A121G)        | IB                     | 234 (SH1E, D95A)                  | 405 (SSTR)                        | 333 (ASP7)                   | 6                           | 2 (American)  | 3 (bITEM-1) | 17         | Neg            | pEG500 (American) |     |     |
| EnNg 239 | 2/27/2012  | Remonte      | 0.25    | LS                 | <-0.008 | S                  | <-0.03  | S                  | <-8     | Not TRNG           | <-0.4   | <-0.5   | S                  | S                  | B                   | Au1                        | 7363  | 7206   | NV6     | 10                    | 13 (L421P)                 | 166                        | 1430 (GI20K, A121V)        | IB                     | 230                               | 947                               | 808 (ASP7)                   | 6                           | Neg           | Neg         | 20         | Pos            | Neg               |     |     |
| EnNg 242 | 2/28/2012  | Remonte      | 0.25    | LS                 | <-0.008 | S                  | <-0.03  | S                  | <-8     | Not TRNG           | <-0.4   | <-0.5   | S                  | S                  | S                   | Iu1                        | 7359  | 4186   | 231     | 231                   | 607                        | 23                         | 1435 (GI20K, A121V)        | IB                     | 646                               | 804                               | 193 (ASP7)                   | 14                          | Neg           | Neg         | 20         | Pos            | Neg               |     |     |
| EnNg 248 | 5/16/2012  | Metropolitan | 0.125   | LS                 | <-0.008 | S                  | <-0.03  | S                  | <-8     | Not TRNG           | <-0.4   | <-0.5   | S                  | S                  | S                   | Iu1                        | 7359  | 4186   | 231     | 231                   | 607                        | 23                         | 1435 (GI20K, A121V)        | IB                     | 646                               | 804                               | 193 (ASP7)                   | 14                          | Neg           | Neg         | 20         | Pos            | Neg               |     |     |
| EnNg 250 | 6/28/2012  | Metropolitan | 0.125   | LS                 | <-0.008 | S                  | <-0.03  | S                  | <-8     | Not TRNG           | <-0.4   | <-0.5   | S                  | S                  | A                   | Iu3                        | 1584  | 4768   | 178     | 231                   | 8                          | 294                        | 874 (GI20K, A121V)         | IB                     | 19                                | 260                               | 371 (BC)                     | 6                           | Neg           | Neg         | 17         | Pos            | pEP233            |     |     |
| EnNg 252 | 7/23/2012  | Remonte      | 0.125   | LS                 | <-0.008 | S                  | <-0.03  | S                  | <-8     | Not TRNG           | <-0.4   | <-0.5   | S                  | S                  | A                   | Au1                        | 12045 | 758    | NV14    | 538                   | 13 (L421P)                 | 166                        | 536                        | IA                     | 230                               | 952                               | 809 (ASP7)                   | 6                           | Neg           | Neg         | 612        | Pos            | Neg               |     |     |
| EnNg 253 | 7/30/2012  | Remonte      | 0.125   | LS                 | <-0.008 | S                  | <-0.03  | S                  | <-8     | Not TRNG           | <-0.4   | <-0.5   | S                  | S                  | B                   | Au1                        | 12040 | 7126   | NV9     | 10                    | 8                          | 166                        | 704                        | IA                     | 230                               | 402                               | 808 (ASP7)                   | 6                           | Neg           | Neg         | 17         | Pos            | Neg               |     |     |
| EnNg 254 | 8/21/2012  | Metropolitan | 0.25    | LS                 | <-0.008 | S                  | <-0.03  | S                  | <-8     | Not TRNG           | <-0.4   | <-0.5   | S                  | S                  | B                   | Au1                        | 7363  | 1017   | NV7     | 10                    | 13 (L421P)                 | 166                        | 1442                       | IA                     | 230                               | 402                               | 808 (ASP7)                   | 6                           | Neg           | Neg         | 17         | Pos            | Neg               |     |     |
| EnNg 257 | 9/4/2012   | Metropolitan | >=2     | PPNG               | 0.016   | DS                 | >=4     | H                  | <-8     | Not TRNG           | <-0.4   | <-0.5   | S                  | S                  | S                   | Iu1                        | 7822  | 10106  | 73      | 430                   | 15 (L421P)                 | 124 (GI20K, A121D)         | IB                         | 234 (SH1E, D95A)       | 509 (SSTR)                        | 12 (G4SD)                         | 3 (-35A)                     | 1 (Duch)                    | 2 (bITEM-135) | 17          | Neg        | pEP289 (Dutch) |                   |     |     |
| EnNg 259 | 9/21/2012  | Remonte      | 0.125   | LS                 | <-0.008 | S                  | <-0.03  | S                  | <-8     | Not TRNG           | <-0.4   | <-0.5   | S                  | S                  | C                   | Au1                        | 12040 | 7126   | NV8     | 10                    | 8                          | 166                        | 704                        | IA                     | 230                               | 402                               | 808 (ASP7)                   | 6                           | Neg           | Neg         | 17         | Pos            | Neg               |     |     |
| EnNg 261 | 9/29/2012  | Metropolitan | 0.125   | LS                 | <-0.008 | S                  | <-0.03  | S                  | >=16    | TRNG               | <-0.4   | <-0.5   | S                  | S                  | C                   | Au2                        | 12042 | 9716   | NV5     | 539                   | 13 (L421P)                 | 23                         | 1431                       | IA                     | 19                                | 951                               | 953 (BC)                     | 6                           | 2 (American)  | Neg         | 17         | Pos            | pEG500 (American) |     |     |
| EnNg 264 | 10/8/2012  | Remonte      | 0.25    | LS                 | <-0.008 | S                  | <-0.03  | S                  | >=16    | TRNG               | <-0.4   | <-0.5   | S                  | S                  | C                   | Au2                        | 12042 | 9716   | NV5     | 539                   | 13 (L421P)                 | 23                         | 1431                       | IA                     | 19                                | 951                               | 953 (BC)                     | 6                           | 2 (American)  | Neg         | 17         | Pos            | pEG500 (American) |     |     |
| EnNg 266 | 10/9/2012  | Remonte      | 0.25    | LS                 | <-0.008 | S                  | <-0.03  | S                  | <-8     | Not TRNG           | <-0.4   | <-0.5   | S                  | S                  | A                   | Au1                        | 7363  | 7206   | NV6     | 10                    | 13 (L421P)                 | 166                        | 1430 (GI20K, A121V)        | IB                     | 816                               | 947                               | 808 (ASP7)                   | 6                           | Neg           | Neg         | 20         | Pos            | Neg               |     |     |
| EnNg 270 | 11/0/2013  | Remonte      | 0.25    | LS                 | <-0.008 | S                  | >=4     | H                  | <-8     | Not TRNG           | <-0.4   | <-0.5   | S                  | S                  | S                   | Iu1                        | 7822  | 5267   | 73      | 304                   | 16 (L421P)                 | 23                         | 1437 (GI20K, A121D)        | IB                     | 234 (SH1E, D95A)                  | 509 (SSTR)                        | 12 (G4SD)                    | 3 (-35A)                    | new (BC)      | Neg         | 17         | Pos            | pEP289 (Dutch)    |     |     |
| EnNg 271 | 3/7/2013   | Remonte      | 0.125   | LS                 | <-0.008 | S                  | <-0.03  | S                  | >=16    | TRNG               | <-0.4   | <-0.5   | S                  | S                  | C                   | Au2                        | 12042 | 9716   | NV5     | 539                   | 13 (L421P)                 | 23                         | 1431                       | IA                     | 19                                | 951                               | 953 (BC)                     | 6                           | 2 (American)  | Neg         | 17         | Pos            | pEG500 (American) |     |     |
| EnNg 272 | 4/14/2013  | Metropolitan | 0.25    | LS                 | <-0.008 | S                  | <-0.03  | S                  | <-8     | Not TRNG           | <-0.4   | <-0.5   | S                  | S                  | B                   | Au1                        | 7363  | 10117  | NV7     | 10                    | 13 (L421P)                 | 166                        | 1442                       | IA                     | 230                               | 402                               | 808 (ASP7)                   | 6                           | Neg           | Neg         | 17         | Neg            | Neg               |     |     |
| EnNg 277 | 6/24/2013  | Remonte      | 0.125   | LS                 | <-0.008 | S                  | <-0.03  | S                  | <-8     | Not TRNG           | <-0.4   | <-0.5   | S                  | S                  | B                   | Au1                        | 12044 | 10118  | NV6     | 430                   | 13 (L421P)                 | 166                        | 1443 (GI20K, A121V)        | IB                     | 230                               | 402                               | 808 (ASP7)                   | 6                           | Neg           | Neg         | 17         | Pos            | Neg               |     |     |
| EnNg 278 | 6/24/2013  | Remonte      | 0.125   | LS                 | <-0.008 | S                  | <-0.03  | S                  | <-8     | Not TRNG           | <-0.4   | <-0.5   | S                  | S                  | A                   | Au1                        | 12046 | 8063   | NV17    | 10                    | 13 (L421P)                 | 166                        | 704                        | IA                     | 230                               | 952                               | 808 (ASP7)                   | 6                           | Neg           | Neg         | 17         | Pos            | pEP233            |     |     |
| EnNg 281 | 6/29/2013  | Metropolitan | 2       | CMRP               | 0.03    | DS                 | >=4     | H                  | <-8     | Not TRNG           | <-0.4   | <-0.5   | S                  | S                  | A                   | Iu2                        | 1901  | 4822   | 90      | 437                   | 18 (L421P)                 | 266 (XXXIV Mosaic)         | 1438 (GI20K, A121N)        | IB                     | 14 (SH1E, D95G)                   | 104 (SSTR)                        | 13                           | 3 (-35A)                    | Neg           | Neg         | 18 (R25H)  | Pos            | Neg               |     |     |
| EnNg 282 | 7/4/2013   | Remonte      | 0.25    | LS                 | <-0.008 | S                  | <-0.03  | S                  | <-8     | Not TRNG           | <-0.4   | <-0.5   | S                  | S                  | A                   | Au1                        | 12045 | 7126   | NV17    | 10                    | 13 (L421P)                 | 166                        | 704                        | IA                     | 230                               | 953                               | 811 (ASP7)                   | 6                           | Neg           | Neg         | 612        | Pos            | Neg               |     |     |
| EnNg 283 | 7/7/2013   | Remonte      | >=2     | PPNG               | <-0.008 | S                  | >=4     | H                  | <-8     | Not TRNG           | <-0.4   | <-0.5   | S                  | S                  | S                   | Iu1                        | 1890  | 8842   | NV1     | 234                   | 13 (L421P)                 | 515                        | 1439                       | IA                     | 193 (ASP7)                        | 6                                 | Neg                          | 3 (bITEM-1)                 | 17            | Neg         | Neg        | 17             | Pos               | Neg |     |
| EnNg 285 | 7/17/2013  | Remonte      | 0.25    | LS                 | <-0.008 | S                  | <-0.03  | S                  | <-8     | Not TRNG           | <-0.4   | <-0.5   | S                  | S                  | A                   | Au1                        | 12045 | 758    | NV16    | 10                    | 13 (L421P)                 | 166                        | 536                        | IA                     | 230                               | 953                               | 810 (ASP7)                   | 6                           | Neg           | Neg         | 612        | Pos            | Neg               |     |     |
