# Supplementary material for: Genomic epidemiology and population structure of Neisseria gonorrhoeae from remote highly endemic Western Australian populations
Source: PubMed Central journal article supplement (PMC6889462; doi:10.1186/s12864-018-4557-5), 2018-02-27
Supplement: 12864_2018_4557_MOESM3_ESM.pdf [file 12864_2018_4557_MOESM3_ESM.pdf]

Table S3: List of the 72 international *N. gonorrhoeae* isolates from Ezewudo et al.

| Isolate   | Location    | Date | MLST  | Azi MIC | Cef MIC | Tet MIC | Structure group |
|-----------|-------------|------|-------|---------|---------|---------|-----------------|
| CH811     | Chile       | 1982 | 1583  | 0.25    | 0.008   | 2       | Int1            |
| GCI-182   | Canada      | 1982 | 1583  | 0.5     | 0.008   | 4       | Int4            |
| SK708     | Canada      | 2006 | 1594  | 1       | 0.016   | 0.5     | Int1            |
| SK1902    | Canada      | 2006 | 10935 | 0.25    | 0.002   | 256     | Int1            |
| SK7461    | Canada      | 2008 | 1901  | 0.5     | 0.032   | 8       | Int1            |
| SK7842    | Canada      | 2006 | 10010 | 1       | 0.016   | 8       | Int1            |
| SK8976    | Canada      | 2006 | 1594  | 0.06    | 0.004   | 2       | Int1            |
| SK12684   | Canada      | 2006 | 31129 | 0.5     | 0.016   | 8       | Int4            |
| SK33414   | Canada      | 2007 | 1928  | 0.25    | 0.008   | 4       | Int1            |
| SK14515   | Canada      | 2005 | 1893  | 0.25    | 0.016   | 2       | Int4            |
| SK15454   | Canada      | 2007 | 1585  | 0.06    | 0.004   | 2       | Int3            |
| SK16259   | Canada      | 2007 | 1893  | 0.125   | 0.008   | 4       | Int4            |
| SK16942   | Canada      | 2005 | 1893  | 0.125   | 0.016   | 2       | Int4            |
| SK17973   | Canada      | 2006 | 1893  | 1       | 0.016   | 8       | Int4            |
| SK22871   | Canada      | 2007 | 8122  | 0.125   | 0.004   | 4       | Int1            |
| SK23020   | Canada      | 2006 | 1901  | 0.25    | 0.125   | 16      | Int2            |
| SK28355   | Canada      | 2007 | 1893  | 0.25    | 0.016   | 4       | Int4            |
| SK29344   | Canada      | 2007 | 10010 | 0.125   | 0.008   | 4       | Int1            |
| SK29471   | Canada      | 2005 | 1893  | 0.25    | 0.016   | 2       | Int4            |
| SK32402   | Canada      | 2007 | 8153  | 0.5     | 0.016   | 4       | Int2            |
| SK36809   | Canada      | 2007 | 8126  | 2       | 0.008   | 8       | Int4            |
| SK39420   | Canada      | 2008 | 1585  | 0.5     | 0.016   | 0.5     | Int3            |
| ALB0303   | USA         | 2011 | 1588  | 0.03    | 0.015   | 16      | Int1            |
| ALB0403   | USA         | 2011 | 1901  | 1       | 0.125   | 4       | Int2            |
| ATL0103   | USA         | 2011 | 10931 | 0.5     | 0.015   | 0.25    | Int1            |
| ALB0102   | USA         | 2011 | 1901  | 0.25    | 0.06    | 2       | Int2            |
| ATL0105   | USA         | 2011 | 1588  | 0.06    | 0.015   | 0.25    | Int1            |
| ATL0108   | USA         | 2011 | 1584  | 0.03    | 0.015   | 0.25    | Int3            |
| ATL0117   | USA         | 2011 | 10932 | 0.125   | 0.015   | 16      | Int1            |
| ATL0121   | USA         | 2011 | 1902  | 0.5     | 0.03    | 1       | Int1            |
| ATL0125   | USA         | 2011 | 1901  | 0.25    | 0.015   | 1       | Int2            |
| ATL0508   | USA         | 2011 | 1585  | 0.06    | 0.015   | 16      | Int3            |
| ATL0513   | USA         | 2011 | 1893  | 0.25    | 0.03    | 2       | Int4            |
| MIA0202   | USA         | 2011 | 1901  | 0.5     | 0.03    | 2       | Int1            |
| MIA0309   | USA         | 2011 | 1931  | 0.125   | 0.015   | 16      | Int3            |
| MIA0310   | USA         | 2011 | 1584  | 0.03    | 0.015   | 16      | Int3            |
| MIA0510   | USA         | 2011 | 1901  | 1       | 0.03    | 2       | Int2            |
| MIA0515   | USA         | 2011 | 1901  | 0.25    | 0.03    | 16      | Int2            |
| MIA0516   | USA         | 2011 | 1901  | 0.5     | 0.06    | 8       | Int1            |
| NOR0306   | USA         | 2011 | 1583  | 0.25    | 0.015   | 2       | Int1            |
| NYC0507   | USA         | 2011 | 1901  | 0.25    | 0.06    | 2       | Int2            |
| NYC0513   | USA         | 2011 | 1901  | 0.25    | 0.06    | 4       | Int1            |
| MUNG1     | Canada      | 1991 | 10934 | 0.125   | <0.016  | 0.25    | Int1            |
| MUNG3     | Japan       | 2003 | 7363  | 0.25    | 0.5     | 2       | Int1            |
| MUNG4     | Japan       | 1996 | 1590  | 0.5     | 0.25    | 4       | Int1            |
| MUNG5     | Philippines | 1992 | 1901  | 0.25    | <0.016  | 1       | Int2            |
| MUNG6     | Australia   | 2001 | 10008 | 0.125   | <0.016  | 16      | Int1            |
| MUNG8     | USA         | 2001 | 8127  | 2       | <0.016  | 0.5     | Int4            |
| MUNG9     | Sweden      | 2010 | 1901  | 0.5     | 1       | 2       | Int2            |
| MUNG12    | Norway      | 2010 | 1901  | 0.5     | 0.25    | 4       | Int2            |
| MUNG14    | Norway      | 2010 | 1901  | 0.5     | 0.25    | 4       | Int2            |
| MUNG15    | Austria     | 2011 | 1901  | 0.25    | 1       | 2       | Int2            |
| MUNG17    | Sweden      | 2010 | 1892  | 1       | 0.5     | 2       | Int1            |
| MUNG18    | Norway      | 2010 | 10933 | 0.125   | <0.016  | 2       | Int1            |
| MUNG19    | Sweden      | 2010 | 1580  | >=256   | <0.016  | 2       | Int4            |
| MUNG20    | Sweden      | 2013 | 7363  | 0.25    | 0.5     | 2       | Int1            |
| MUNG21    | Pakistan    | 2008 | 1902  | 1       | 0.032   | 2       | Int1            |
| MUNG23    | Sweden      | 1998 | 1585  | 0.064   | <0.016  | 0.125   | Int3            |
| MUNG25    | Sweden      | 1998 | 1901  | 0.125   | <0.016  | 0.5     | Int2            |
| MUNG26    | Sweden      | 1999 | 1584  | 0.064   | <0.016  | 0.5     | Int3            |
| FA1090    |             |      | 1899  |         |         |         | Int1            |
| FA19      |             |      | 1892  |         |         |         | Int2            |
| NCCP11945 | South Korea |      | 1901  |         |         |         | Int2            |
| DG12      | USA         |      | 8421  |         |         |         | Int1            |
| PID24     | USA         |      | 8418  |         |         |         | Int1            |
| DG118     | USA         |      | 8418  |         |         |         | Int1            |
| FA6140    | USA         |      | 1927  |         |         |         | Int1            |
| PID18     | USA         |      | 1926  |         |         |         | Int1            |
| NG1291    | USA         |      | 8422  |         |         |         | Int1            |
| F62       |             |      | 1900  |         |         |         | Int1            |
| PID332    | USA         |      | 1594  |         |         |         | Int1            |
| MS11      |             |      | 6959  |         |         |         | Int1            |
